# Supplementary material for: Proteomic analysis of low- and high-grade human colon adenocarcinoma tissues and tissue-derived primary cell lines reveals unique biological functions of tumours and new protein biomarker candidates
Source: Research Square preprint supplement (doi:10.21203/rs.3.rs-1420689/v1), 2022-03-07

**Additional File 7: Overlap of proteins identified by LC-MS/MS.** Venn diagrams showing the overlap of proteins identified across biological replicates for the 4 LGCA-derived cell lines (**A**) and the 4 HGCA-derived cell lines (**B**), for the 4 NC tissue samples taken from LGCA patients (**C**) and the 4 NC tissue samples taken from HGCA patients (**D**), and in the 4 LGCA tumours (**E**) and 4 HGCA tumours (**F**). Venn diagrams were produced using the Venny 2.1 online tool (https://bioinfogp.cnb.csic.es/tools/venny/)


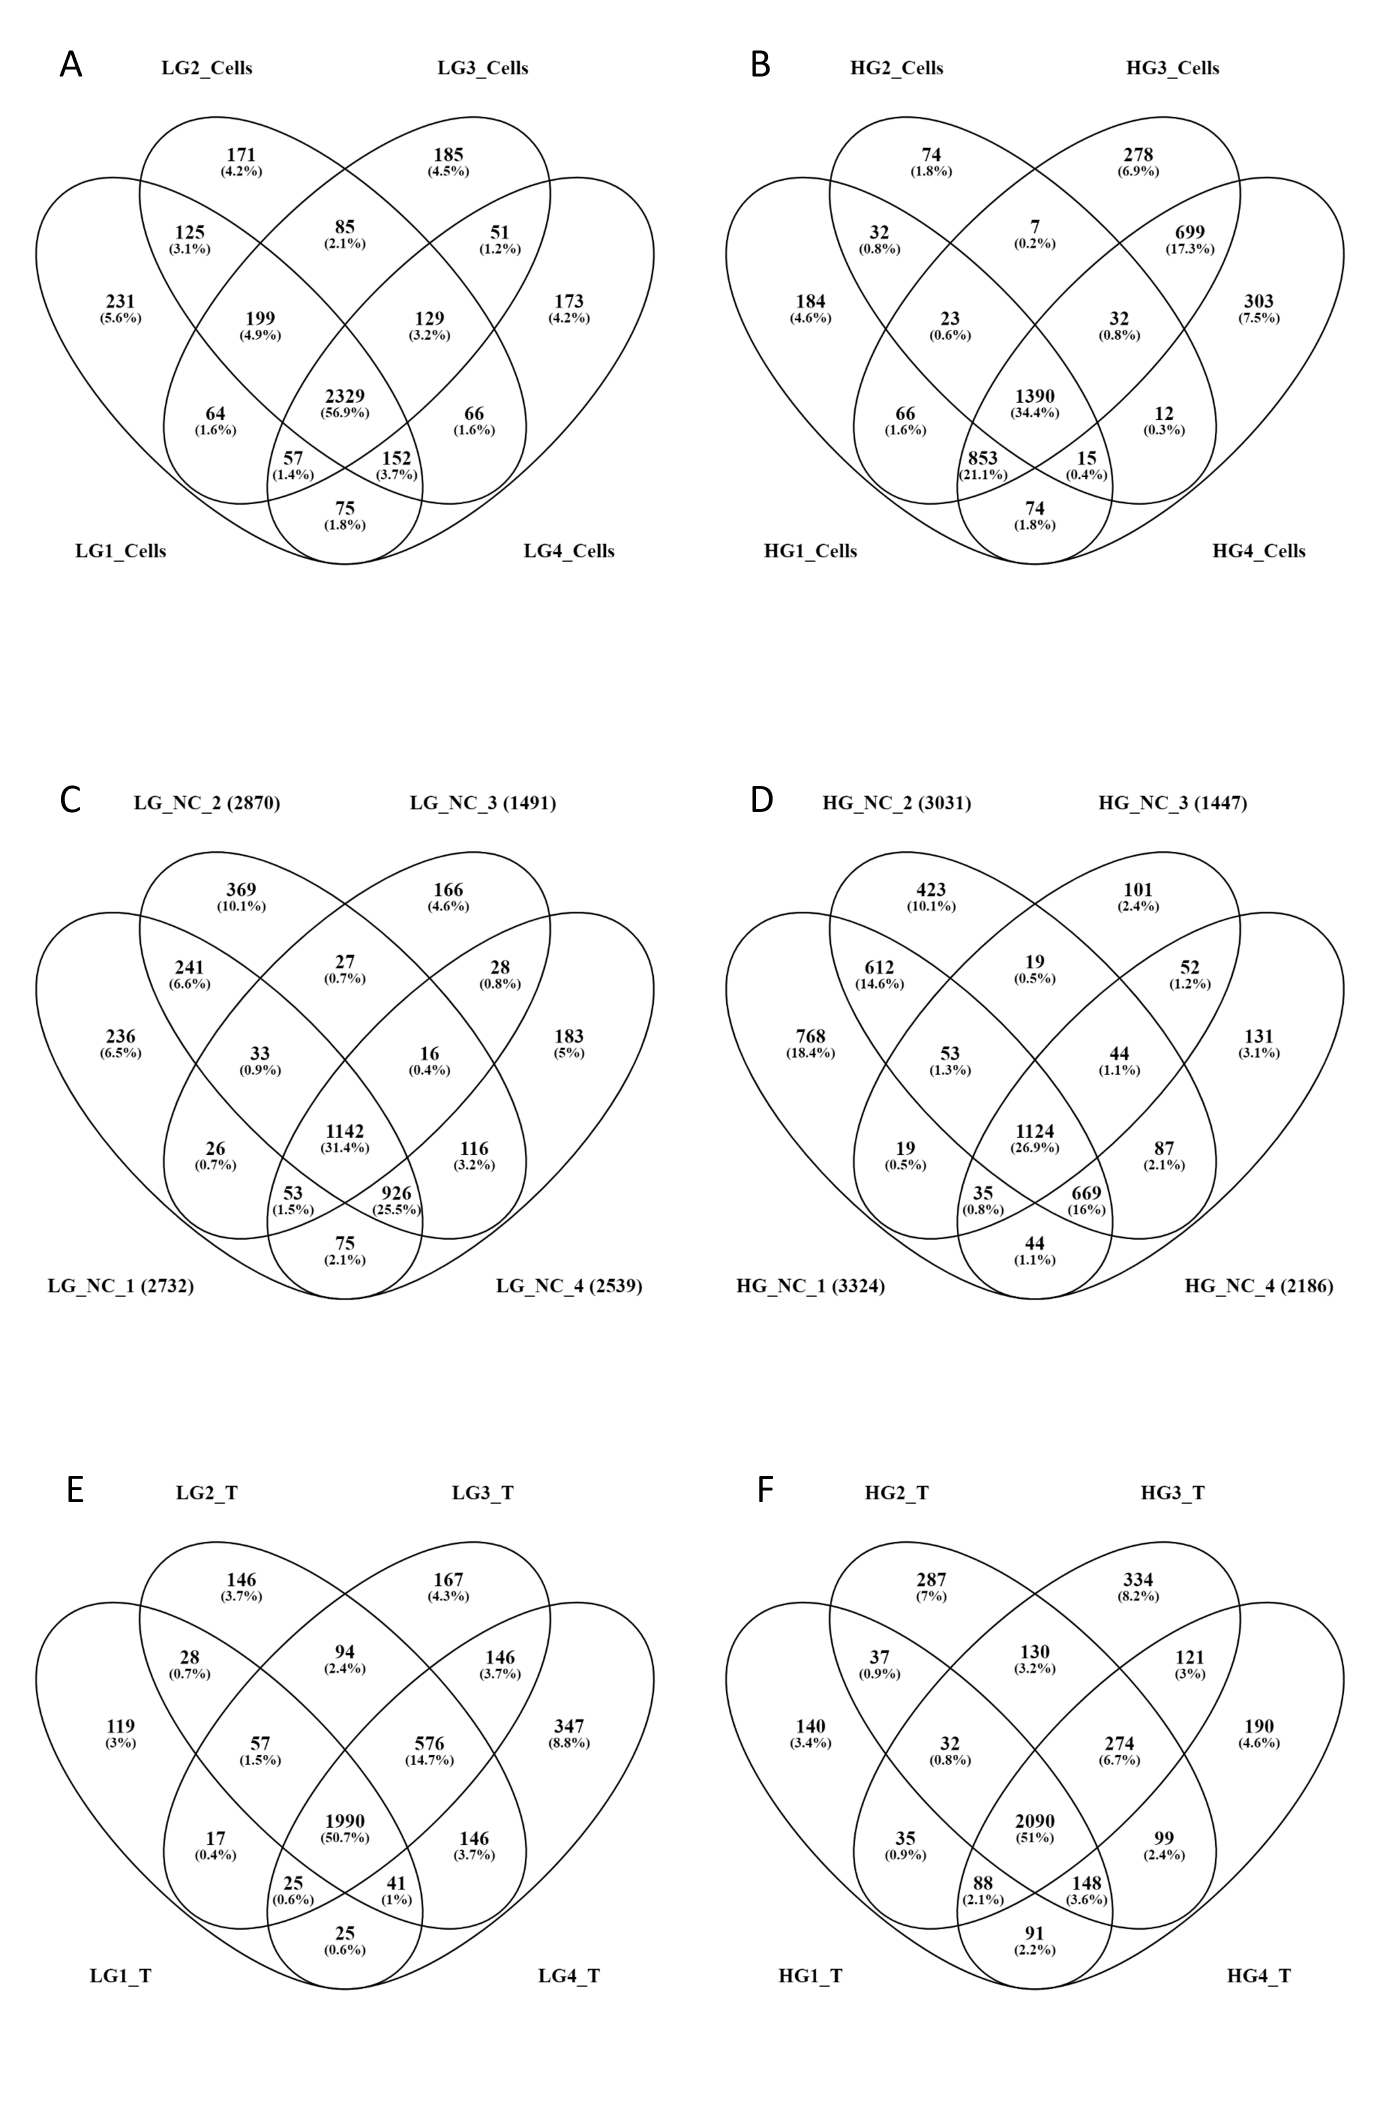

Supplement: Supplementary file 2 [file eaea3e21eedac1b6f3b97fbc.docx]
